# Supplementary material for: Roles of the self-reconstruction layer in the catalytic stability of a NiFeP catalyst during the oxygen evolution reaction
Source: Royal Society of Chemistry journal article supplement (doi:10.1039/d2ta06514b), 2022-11-22
Supplement: d2ta06514b1.pdf [file d2ta06514b1.pdf]

## Supporting Information

### Roles of self-reconstruction layer in catalytic stability of NiFeP catalyst during oxygen evolution reaction

Fuzhen Zhao<sup>a</sup>, Xinyu Mao<sup>a</sup>, Xin Zheng<sup>b</sup>, Huicong Liu<sup>a</sup>, Liqun Zhu<sup>a</sup>, Weiping Li<sup>a</sup>, Ze Wang<sup>a</sup>, Haining Chen<sup>a,\*</sup>

<sup>a</sup> School of Materials Science and Engineering, Beihang University, No. 37 Xueyuan Road, Haidian District, Beijing 100191, China

<sup>b</sup> State Key Laboratory of Heavy Oil Processing, China University of Petroleum, Beijing 102249, China

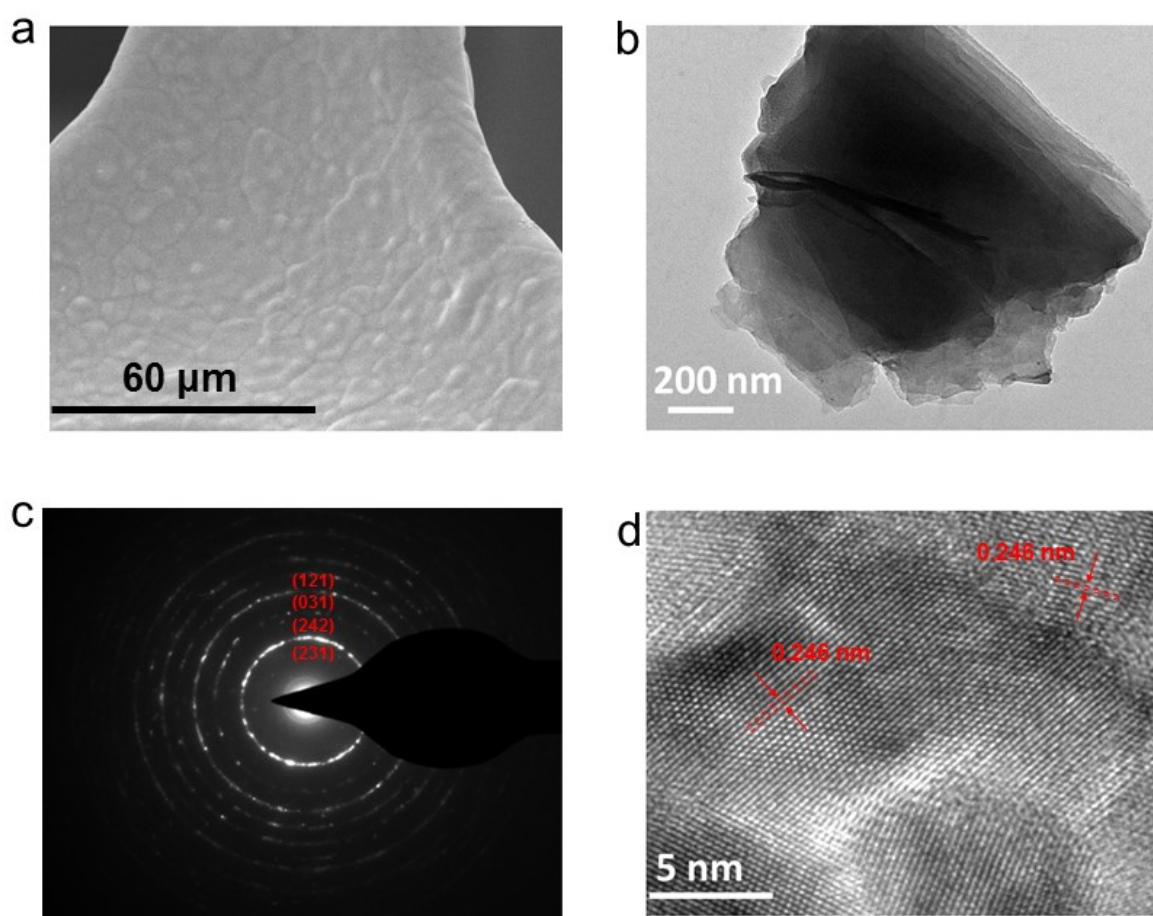

**Figure S1. SEM and TEM Characterizations.** (a) SEM image. (b) TEM image, (c) SAED pattern and (d) HRTEM image of polycrystalline  $(\text{Ni}_{1-x}\text{Fe}_x)_3\text{P}$ .

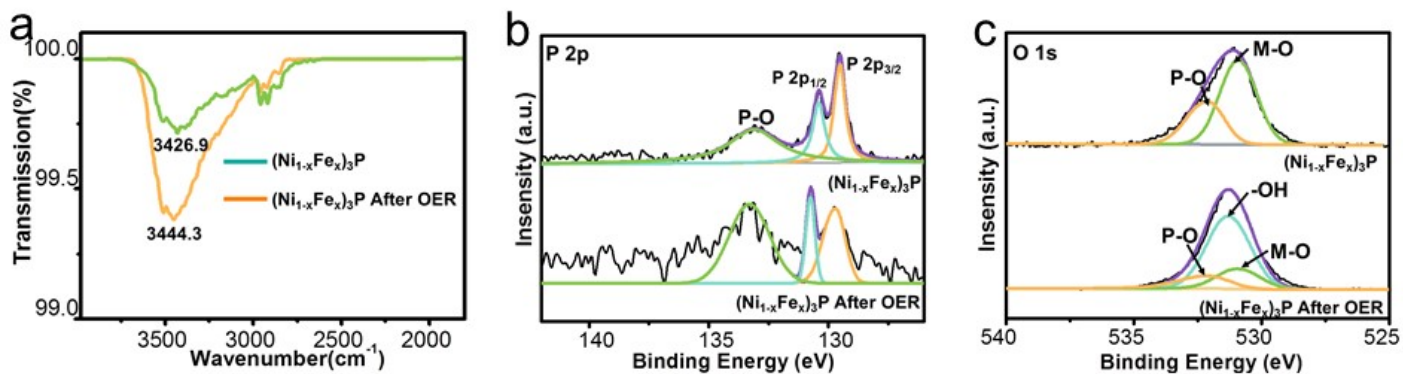

**Figure S2.** Characterizations of  $(\text{Ni}_{1-x}\text{Fe}_x)_3\text{P}$  before and after stability measurement. (a) FTIR spectra. (b) P 2p XPS spectra and (c) O 1s XPS spectra.

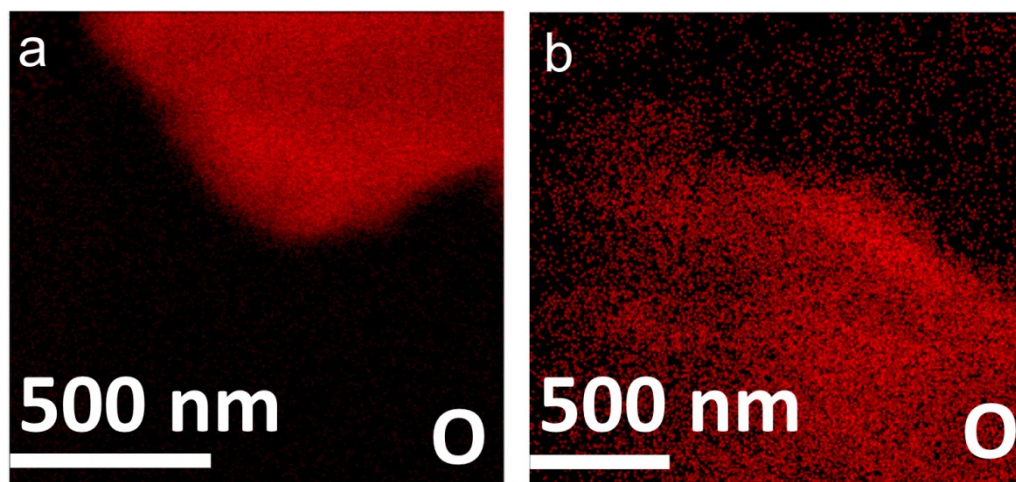

**Figure S3.** EDS mapping images of catalyst (a) before stability measurement and (b) after 30 h stability measurement.

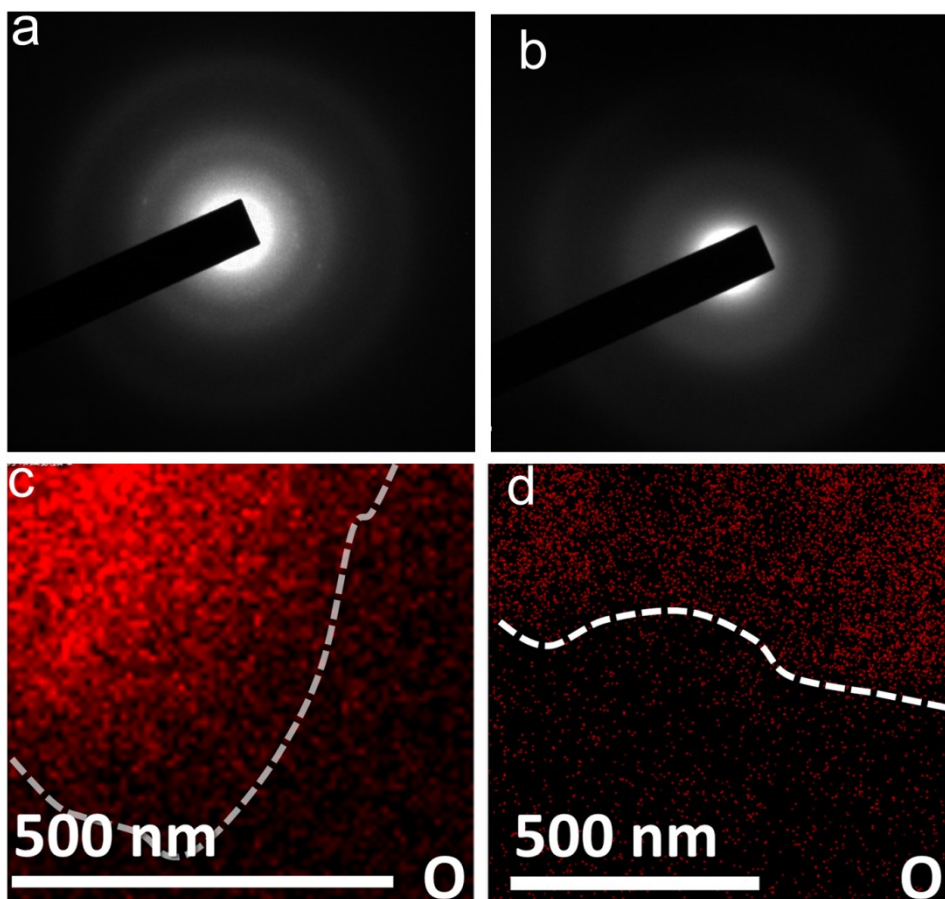

**Figure S4.** (a, b) SAED patterns and (c, d) EDS mapping images of exfoliated self-reconstruction layer (a, c) after 10 h stability measurement and (b, d) after 30 stability measurement.

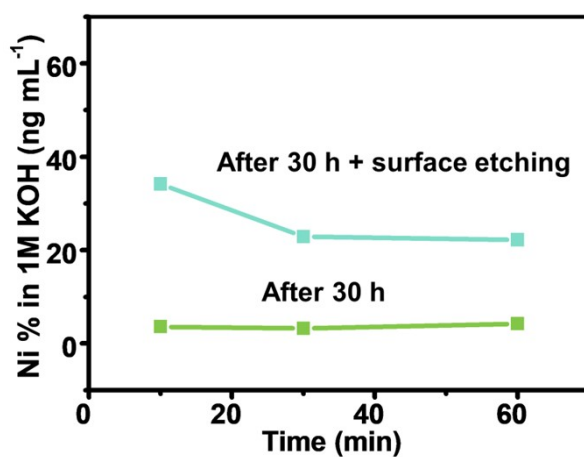

**Figure S5.** (a) Ni concentration in electrolyte at the current density of  $100 \text{ mA cm}^{-2}$ .

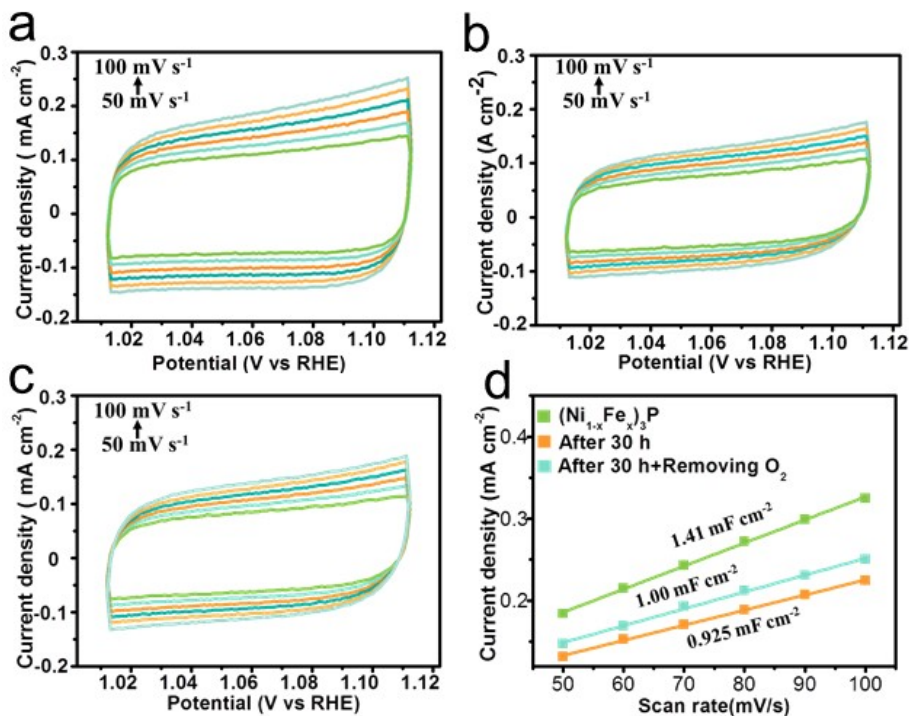

**Figure S6.** Measurements for electrochemical surface area (ECSA). (a) CV curves of  $(\text{Ni}_{1-x}\text{Fe}_x)_3\text{P}$ , (b) CV curves of  $(\text{Ni}_{1-x}\text{Fe}_x)_3\text{P}$  after 30 hours stability measurement, (c) CV curves of  $(\text{Ni}_{1-x}\text{Fe}_x)_3\text{P}$  after 30 hours stability measurement and removing  $\text{O}_2$  and (d) current differences plotted against scan rates.

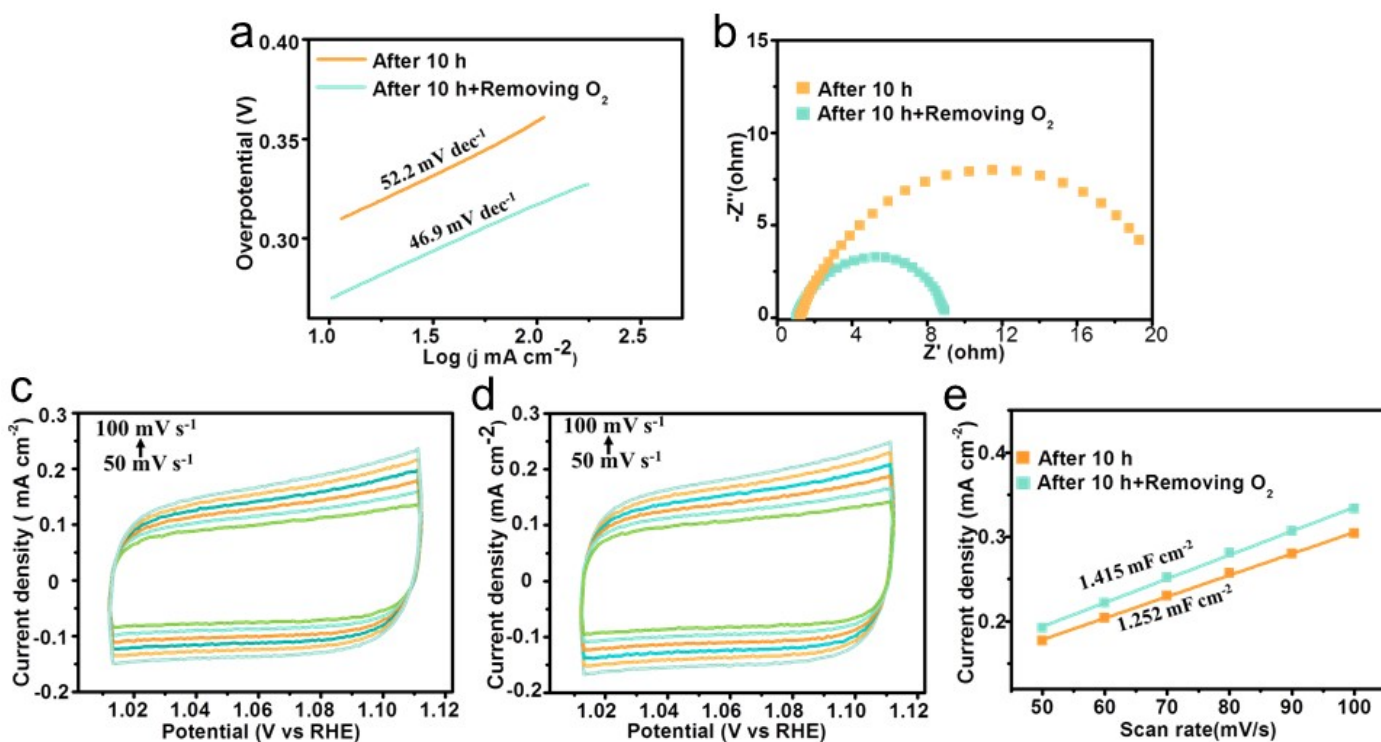

**Figure S7.** OER performance of  $(\text{Ni}_{1-x}\text{Fe}_x)_3\text{P}$  after 10 hours stability measurement. (a) Tafel slopes before and after removing  $\text{O}_2$ . (b) EIS spectra before and after removing  $\text{O}_2$  (c) CV curves for ECSA before removing  $\text{O}_2$ , (d) CV curves for ECSA after removing  $\text{O}_2$  and (e) current differences plotted against scan rates.



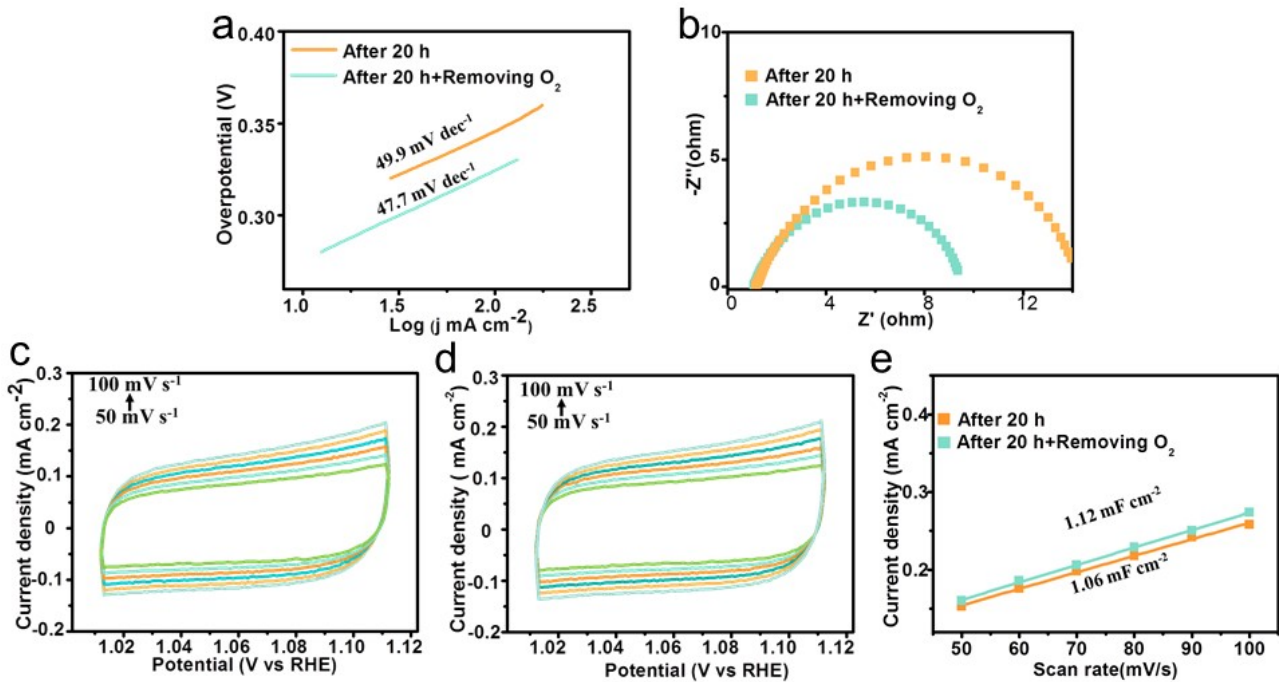

**Figure S8. OER performance of  $(\text{Ni}_{1-x}\text{Fe}_x)_3\text{P}$  after 20 hours stability measurement.** (a) Tafel slopes before and after removing  $\text{O}_2$ . (b) EIS spectra before and after removing  $\text{O}_2$  (c) CV curves for ECSA before removing  $\text{O}_2$ , (d) CV curves for ECSA after removing  $\text{O}_2$  and (e) current differences plotted against scan rates.

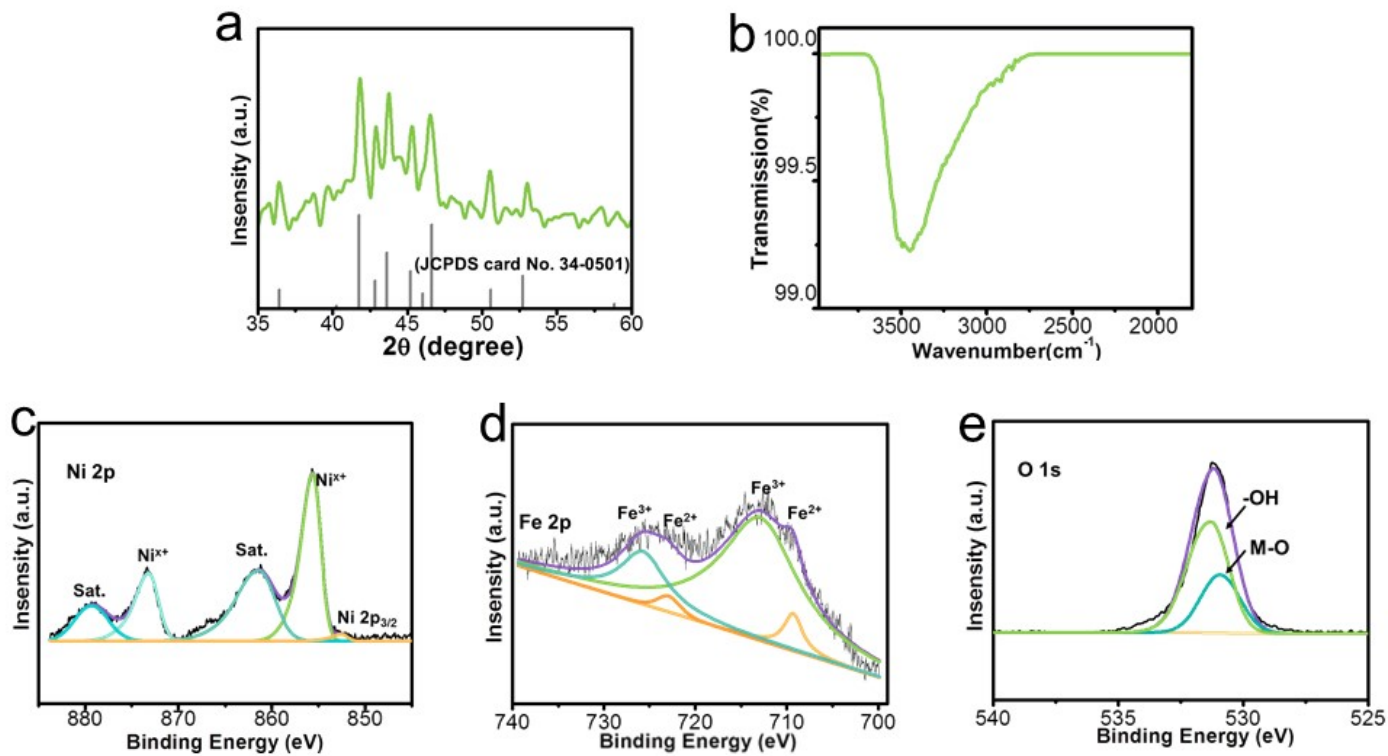

**Figure S9. Characterizations of superareophobic heterostructure.** (a) XRD pattern. (b) FTIR spectrum. (c) Ni 2p XPS s spectrum, (d) Fe 2p XPS spectrum and (e) O 1s XPS spectrum.

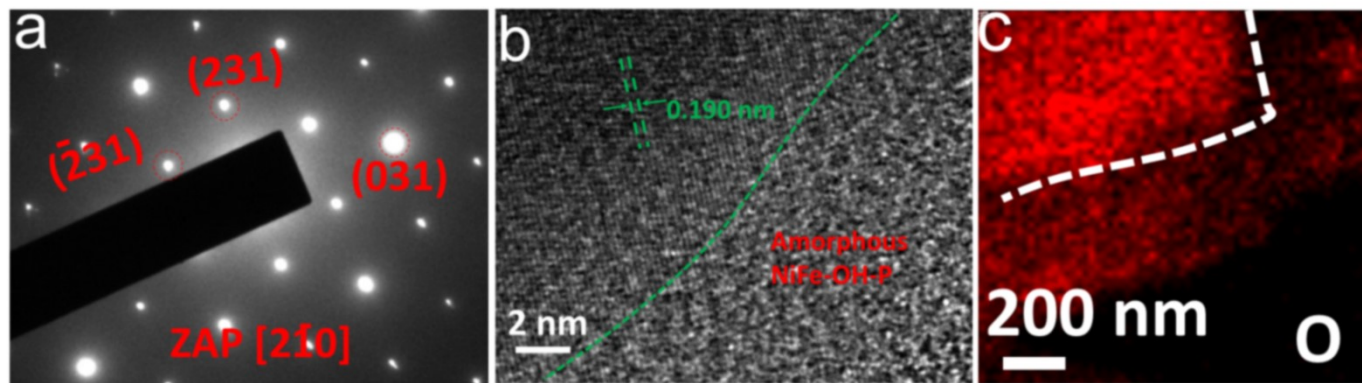

**Figure S10.** (a) SAED pattern, (b) HRTEM image and (c) EDS elemental mapping image of superareophobic heterostructure.

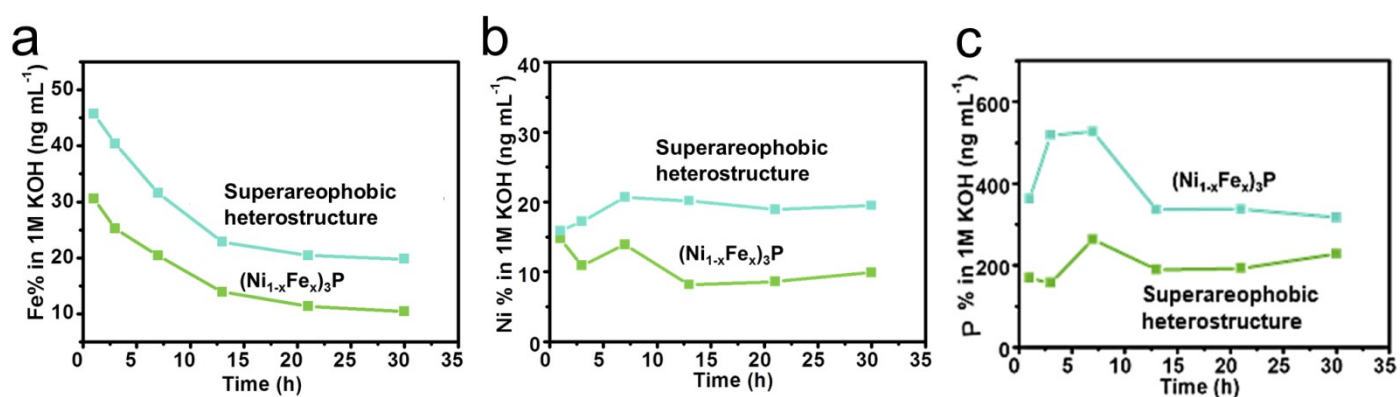

**Figure S11.** ICP-MS measurements for (a) Fe concentration, (b) Ni concentration and (c) P concentration in electrolyte during stability test.

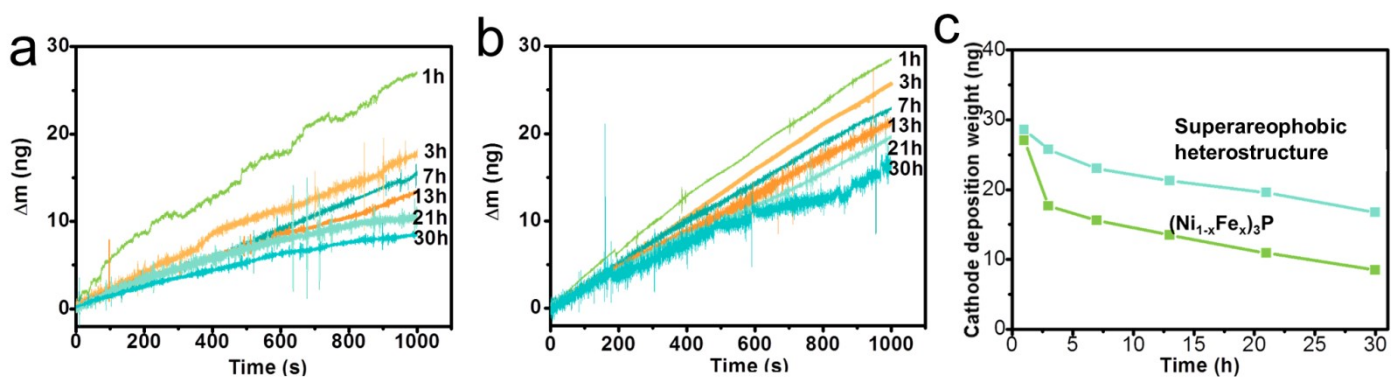

**Figure S12.** EQCM measurements for both Fe and Ni concentration in electrolyte during stability test for (a) (Ni<sub>1-x</sub>Fe<sub>x</sub>)<sub>3</sub>P and (b) superareophobic heterostructure. (c) The results of EQCM measurements.

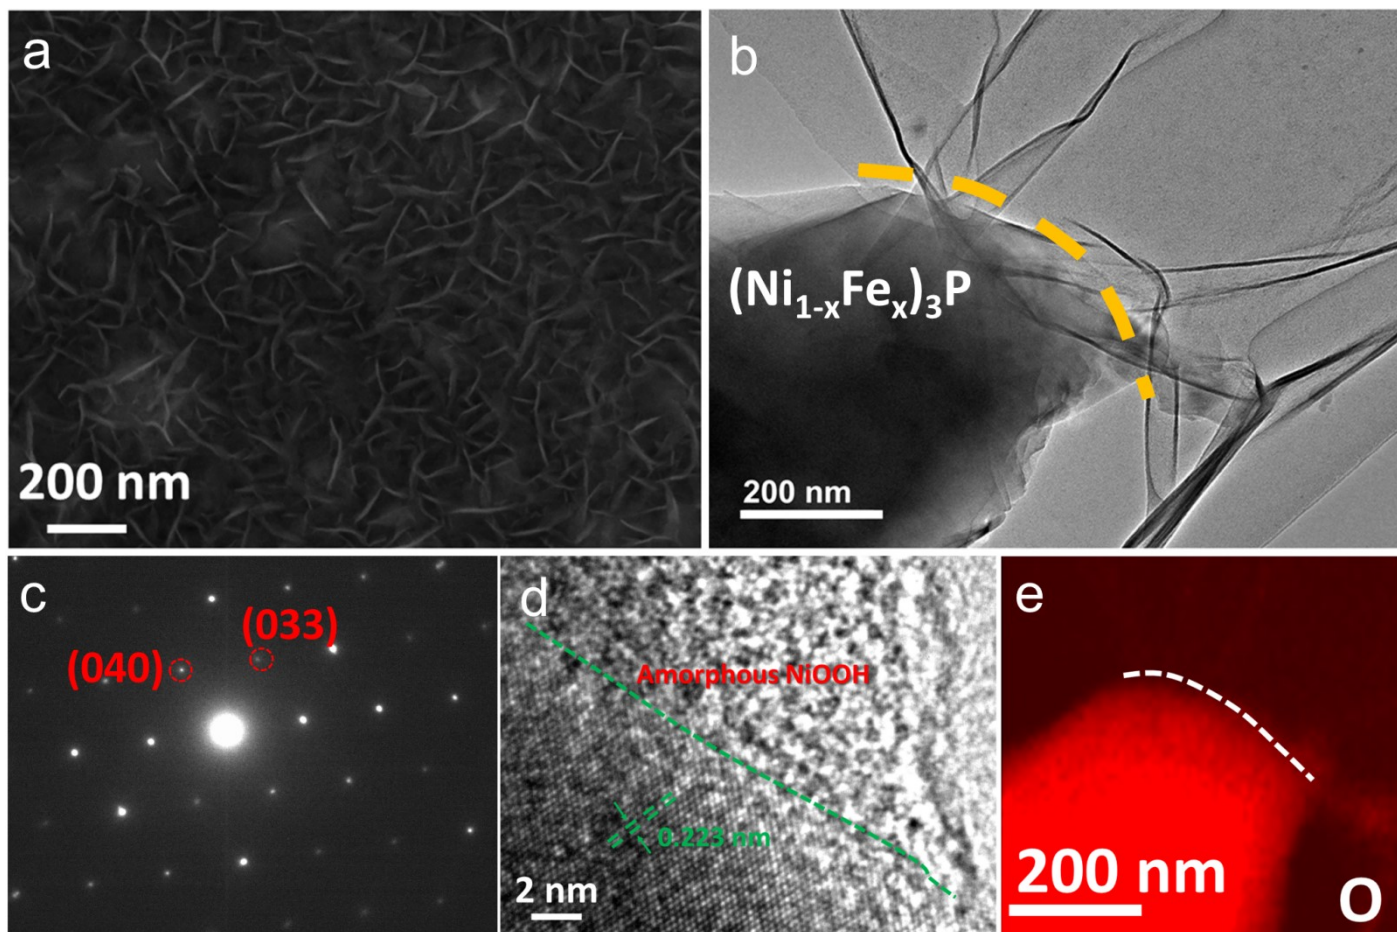

**Figure S13. SEM and TEM Characterizations of superareophobic heterostructure after stability measurement.** (a) SEM image, (b) TEM image, (c) SAED pattern, (d) HRTEM image and (e) EDS elemental mapping image of O.

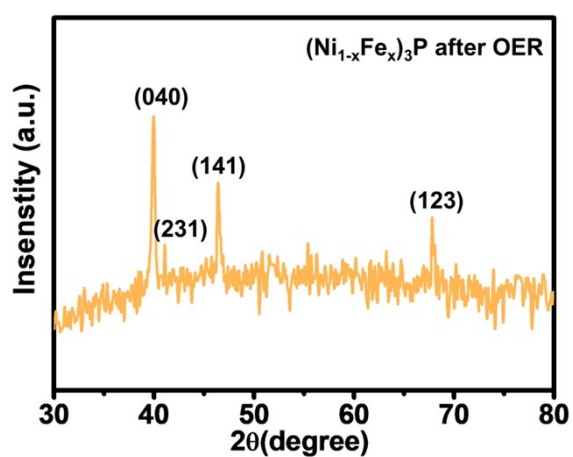

**Figure S14. GIXRD patterns of the  $(\text{Ni}_{1-x}\text{Fe}_x)_3\text{P}$  after 30 h stability measurement.**

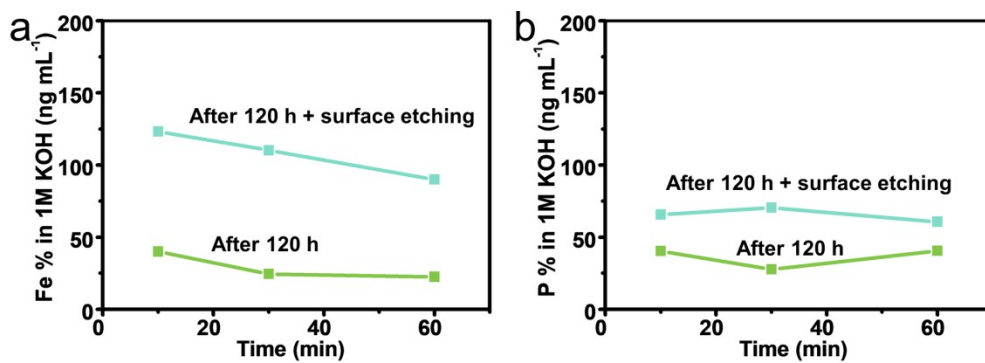

Figure S15 ICP-MS measurements for (a) Fe concentration and (b) P concentration in electrolyte during the OER test of superareophobic heterostructure at the current density of 100 mA cm<sup>-2</sup>.

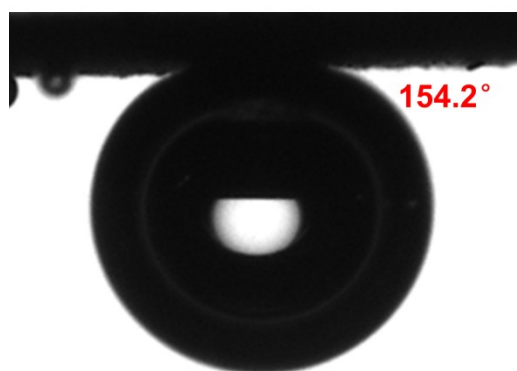

Figure S16 Bubble contact angle measurements of superareophobic heterostructure after 120 h stability measurement.

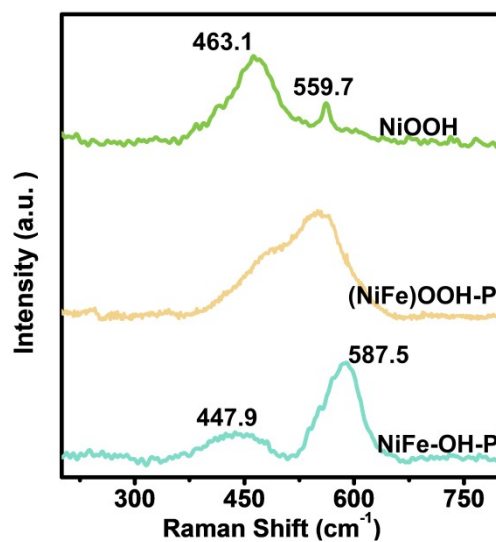

Figure S17 Raman spectra of NiOOH, (NiFe)OOH-P and NiFe-OH-P.



**Table S1.** Thermodynamic data used in the calculations of Gibbs free energy.

|                                                                  | <b>E(eV)</b> | <b>ZPE - TS</b> | <b>G</b>    |
|------------------------------------------------------------------|--------------|-----------------|-------------|
| H <sub>2</sub> O                                                 | -14.218518   | 0.083711        | -14.134807  |
| H <sub>2</sub>                                                   | -6.77        | -0.047005       | -6.817005   |
| O <sub>2</sub>                                                   | -            | -               | -9.71559    |
| OH <sup>-</sup>                                                  | -            | -               | -10.726305  |
| (Ni <sub>1-x</sub> Fe <sub>x</sub> ) <sub>3</sub> P/NiOOH        | -608.52164   | 0               | -608.52164  |
| (Ni <sub>1-x</sub> Fe <sub>x</sub> ) <sub>3</sub> P/NiOOH-OH*    | -620.07073   | 0.315949        | -619.75478  |
| (Ni <sub>1-x</sub> Fe <sub>x</sub> ) <sub>3</sub> P/NiOOH-O*     | -615.86816   | 0.0460          | -615.82216  |
| (Ni <sub>1-x</sub> Fe <sub>x</sub> ) <sub>3</sub> P/NiOOH-OOH*   | -623.97726   | 0.37904         | -623.59822  |
| NiOOH                                                            | -387.89935   | 0               | -387.89935  |
| NiOOH-OH*                                                        | -398.61521   | 0.335117        | -398.28009  |
| NiOOH-O*                                                         | -393.10524   | 0.081           | -393.02424  |
| NiOOH-OOH*                                                       | -402.69087   | 0.260536        | -402.43033  |
| (Ni <sub>1-x</sub> Fe <sub>x</sub> ) <sub>3</sub> P-O/NiOOH      | -655.2196    | 0               | -655.2196   |
| (Ni <sub>1-x</sub> Fe <sub>x</sub> ) <sub>3</sub> P-O/NiOOH-OH*  | -665.15976   | 0.322908        | -664.83685  |
| (Ni <sub>1-x</sub> Fe <sub>x</sub> ) <sub>3</sub> P-O/NiOOH-O*   | -659.84272   | 0.041465        | -659.80126  |
| (Ni <sub>1-x</sub> Fe <sub>x</sub> ) <sub>3</sub> P-O/NiOOH-OOH* | -669.87502   | 0.275137        | -669.599883 |

**Table S2. The results of EDS mapping**

|    | $(\text{Ni}_{1-x}\text{Fe}_x)_3\text{P}$ | $(\text{Ni}_{1-x}\text{Fe}_x)_3\text{P}/\text{NiFeOOH-P}$<br>after 30 h | $(\text{NiFe})\text{OOH-P}$<br>after 10 h | $(\text{NiFe})\text{OOH-P}$<br>after 30 h |
|----|------------------------------------------|-------------------------------------------------------------------------|-------------------------------------------|-------------------------------------------|
|    | Atomic percent<br>(%)                    | Atomic percent<br>(%)                                                   | Atomic percent<br>(%)                     | Atomic percent<br>(%)                     |
| P  | 25.15                                    | 24.76                                                                   | 12.18                                     | 3.55                                      |
| Fe | 8.59                                     | 6.14                                                                    | 10.64                                     | 1.46                                      |
| Ni | 66.26                                    | 69.10                                                                   | 77.18                                     | 94.99                                     |
